# Supplementary material for: Age-related alterations in the oscillatory dynamics serving verbal working memory processing
Source: publisher site journal article supplement (doi:10.18632/aging.205403), 2023-12-27
Supplement: Supplementary file [file aging-v15i24-205403-supplementary-material-SD1.pdf]

SUPPLEMENTARY FIGURE

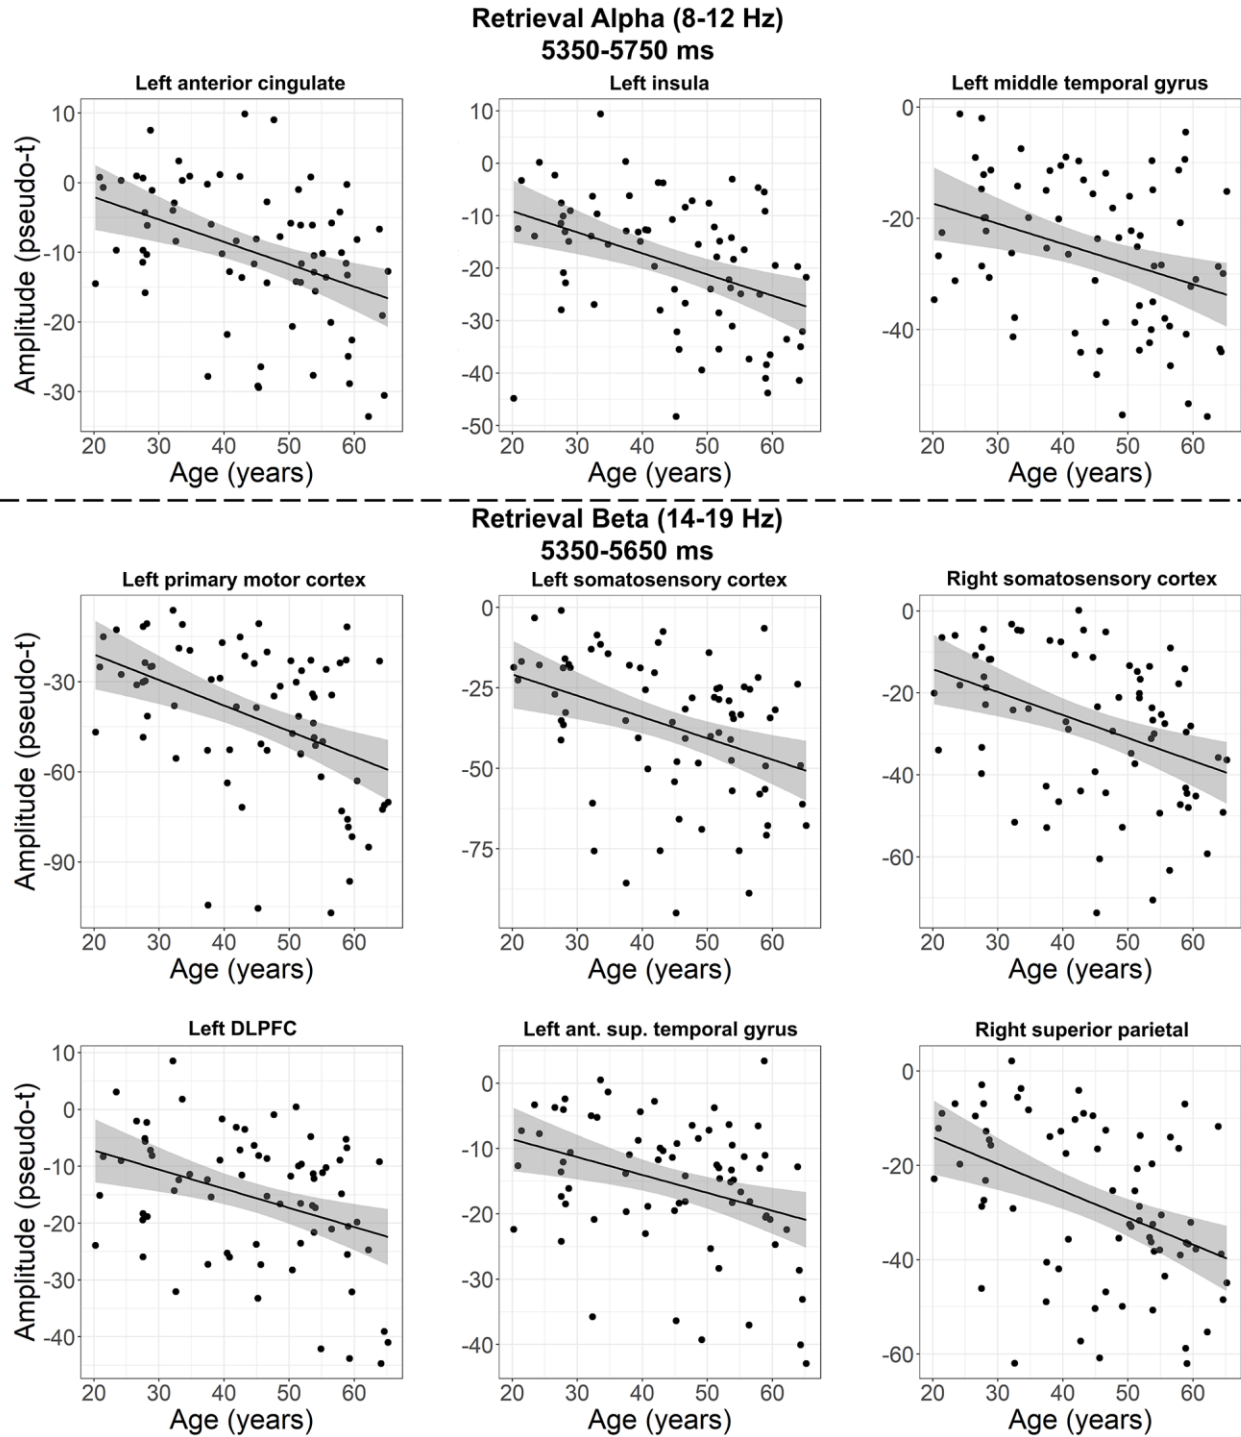

Supplementary Figure 1. Linear regression plots of peak voxel pseudo-t values are shown as a function of age for the alpha and beta retrieval peaks from Figure 5.
